# Supplementary material for: Genetic tool development in marine protists: emerging model organisms for experimental cell biology
Source: Springer Nature journal article supplement (doi:10.1038/s41592-020-0796-x), 2020-04-06
Supplement: MOESM5 [file 41592_2020_796_MOESM5_ESM.xlsx]

## Sheet: O. lucimarinus - Fig. 3A
					Luminescence analysis of O. lucimarinus (RCC802) transformants							R : replicate
Transformant name	Mean Luminescence (RLU)		R1	R2	R3
	RLU
G5	7620		7070	7990	7800
B7	8030		8420	7870	7800
G6-1	8480		7900	9140	8400
H2	9640		9300	9770	9850
C2	14470		14120	14440	14850
G6-2	19730		18720	20570	19900
B10	29910		31030	30160	28540
C10	31020		31230	29790	32040
WT	80		80	80	80
																			O. Lucimarinus

## Sheet: B. prasinos - Fig. 3B
					Luminescence analysis of B. Prasinos (RCC422) transformants							R : replicate
Transformant name	Mean Luminescence (RLU)		R1	R2	R3
A1	100		90	100	110
A2	1940		1930	1900	1990
A3	140		160	130	130
A4	560		560	570	550
A5	120		110	140	110
A6	490		500	480	490
A7	150		150	160	140
A8	140		140	120	160
A9	550		530	550	570
A10	80		80	80	80
A11	140		140	140	140
A12	90		80	90	100
B1	120		100	150	110
B2	2350		2300	2340	2410
wt	70		70	70	70
Transformant name	A1	A2	A3	A4	A5	A6	A7	A8	A9	A10	A11	A12	B1	B2	wt
Mean Luminescence (RLU)	100	1940	140	560	120	490	150	140	550	80	140	90	120	2350	70
R1	90	1930	160	560	110	500	150	140	530	80	140	80	100	2300	70
R2	100	1900	130	570	140	480	160	120	550	80	140	90	150	2340	70
R3	110	1990	130	550	110	490	140	160	570	80	140	100	110	2410	70

## Sheet: M. commoda - Fig. 3C
Cytometry Data behind Figure 3 panel c (middle bar graphs). eGFP fluorescence and transformation efficiency in Micromonas commoda.
							Events by analysis window			Concentrations by analysis window					Green fluorescence by analysis window
Sample name	Pulse	Sample vol	Media vol	Total vol	Dilution	Vol run (ul)	RCC299	high GFP	all GFP*	RCC299/ml	high GFP	all GFP	% high GFP	% all GFP	GFP not transformed	high GFP	all GFP
RCC299 RPS9-GFP-299 day3 EW-113 rep1	EW-113.1	100	300	400	4	97.8	38495	798	2569	97800	2027.39	6526.77	0.02073	0.0667359	1.38	58.28	16.39
RCC299 RPS9-GFP-299 day3 EW-113 rep2	EW-113.2	100	300	400	4	98.8	48776	466	2481	98800	943.923	5025.48	0.00955388	0.0508652	1.22	56.09	11.21
RCC299 RPS9-GFP-299 day3 EW-113 rep3	EW-113.3	100	300	400	4	97.8	50248	437	2570	97800	850.553	5002.11	0.00869686	0.0511463	1.21	55.67	10.74
RCC299 RPS9-GFP-299 day3 no pulse control rep1	No-pulse.1	20	980	1000	50	98	21175	0	4	98000	0	18.5124	0	0.000188902	1.16	0	3.5
RCC299 RPS9-GFP-299 day3 no pulse control rep2	No-pulse.2	20	980	1000	50	98.5	19485	0	1	98500	0	5.05517	0	5.13215e-05	1.15	0	3.1
RCC299 RPS9-GFP-299 day3 no pulse control rep3	No-pulse.3	20	980	1000	50	99.1	20007	0	1	99100	0	4.95327	0	4.99825e-05	1.15	0	3.16
*windows with counts less than 50 are not considered valid for cytometry analysis, this connects to green fluorescence values for No-pulse controls where 1 to 4 particles occurred in the all GFP window and therefore provide a value, but one which is not valid by standard cytometry practices.
